# Supplementary material for: Rich grain boundaries endow networked PdSn nanowires with superior catalytic properties for alcohol oxidation
Source: Royal Society of Chemistry journal article supplement (doi:10.1039/d1nr04993c), 2021-01-01
Supplement: d1nr04993c1.pdf [file d1nr04993c1.pdf]

# Rich grain boundaries endow networked PdSn nanowires with superior catalytic properties for alcohols oxidation

Huaming You<sup>a</sup>, Fei Gao<sup>a</sup>, Cheng Wang<sup>a</sup>, Jie Li<sup>a</sup>, Kewang Zhang<sup>a</sup>, Yangping Zhang<sup>a</sup>,

Yukou Du<sup>a, \*</sup>

<sup>a</sup> College of Chemistry, Chemical Engineering and Materials Science, Soochow University, Suzhou 215123, PR China

\*Corresponding author: Tel: 86-512-65880089, Fax: 86-512-65880089;

E-mail: duyk@suda.edu.cn (Y. Du)

## 1. Experimental Section

### 1.1. Chemicals

Palladium (II) acetylacetonate ( $\text{Pd}(\text{acac})_2$ , 99%), N, N-Dimethylformamide (DMF) were purchased from Sigma-Aldrich. Tin oxalate ( $\text{SnC}_2\text{O}_4$ , 98%) was purchased from Aladdin. Polyvinylpyrrolidone (PVP, K30), Ammonium chloride ( $\text{NH}_4\text{Cl}$ , G.R. grade, 99.8%), and Ethylene glycol (EG, 99%) were purchased from Sinopharm Chemical Reagent Co.Ltd. (Shanghai, China). Water ( $\text{H}_2\text{O}$ ) with a resistivity of  $18\text{M}\Omega/\text{cm}$  was used in this work.

### 1.2. Preparation of electrocatalysts

To synthesize PdSn networked nanowires (NNWs)-1 nanocatalysts, 7.6 mg of  $\text{Pd}(\text{acac})_2$ , 1.7 mg of  $\text{SnC}_2\text{O}_4$ , 100 mg PVP, and 15 mg  $\text{NH}_4\text{Cl}$  were dissolved in 10 mL EG. After ultrasonic treatment for 10 min to obtain a homogeneous solution, the mixture was heated to  $180\text{ }^\circ\text{C}$  in an oil bath and kept for 1 h. Then the PdSn NNWs-1 were collected after centrifugation and washed with ethanol three times. The synthesis of PdSn NNWs-2/PdSn NNWs-3 was similar to that of PdSn NNWs-1, except that 8 mL of EG + 2 ML DMF/5 mL of EG + 5 ML DMF substituted for 10 mL EG.

### 1.3. Physical Characterizations

To study the crystal and structural properties of PdSn NNWs, X-ray diffraction patterns (XRD) were carried out by an X'Pert-Pro MPD diffractometer. X-ray

photoelectron spectroscopy spectra (XPS, VG Scientific ECSALab 220 XL electron spectrometer) were used to analyze the chemical compositions and elemental valences of PdSn NNWs. The structural and compositional properties of PdSn NNWs were examined by the transmission electron microscope (TEM, HT-7700) and high-resolution TEM (HRTEM, F20, operating voltage: 200 kV). The compositions of PdSn NNWs were performed by Scanning electron microscope energy-dispersive X-ray spectroscopy (SEM-EDS, HITACHI S-4700, and operation voltage: 15 kV).

#### 1.4. Preparation and electrochemical measurements

A standard three-electrode system was used to evaluate the electrochemical performance, in which a platinum wire and a saturated calomel electrode (SCE) were used as a counter electrode and a reference electrode, respectively. The working electrode was prepared by loading PdSn NNWs/C ink on the glass carbon electrode (GCE, Diameter: 5 mm). The preparation steps of PdSn NNWs/C ink are as follows: first load PdSn NNWs on Vulcan XC72R carbon black; then, disperse it into 1 ml isopropanol (containing 5  $\mu\text{L}$  Nafion) to make 0.4  $\text{mg}_{\text{Pd}}\text{mL}^{-1}$  ink. After that, 5  $\mu\text{L}$  of uniformly dispersed ink was dropped on the GCE and dried naturally to make a working electrode for testing.

## 2. Figures and Tables

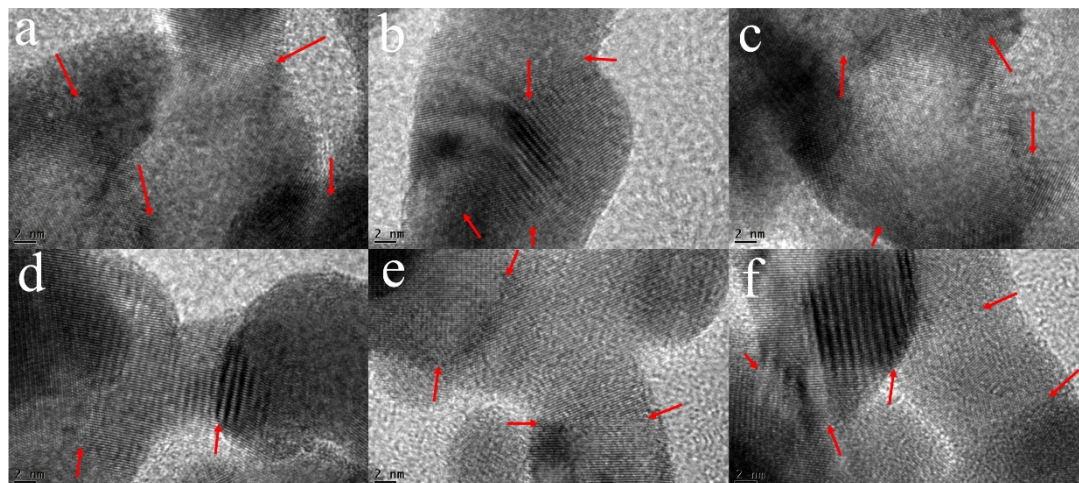

**Fig S1** HRTEM images of PdSn NNWs-3.

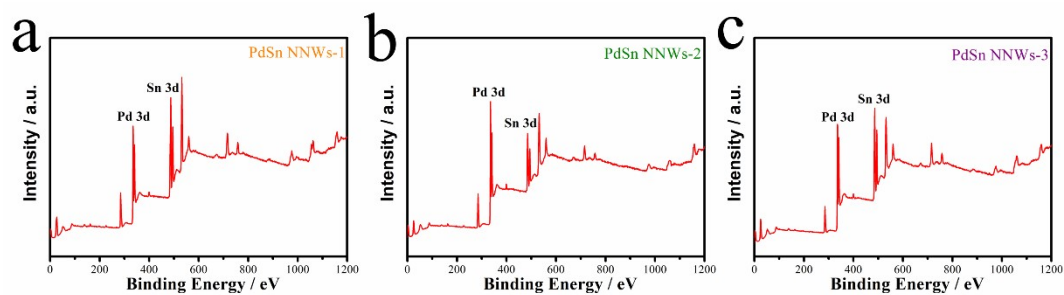

**Fig S2** The XPS analysis of survey spectrum of (a) PdSn NNWs-1, (b) PdSn NNWs-2, and (c) PdSn NNWs-3.

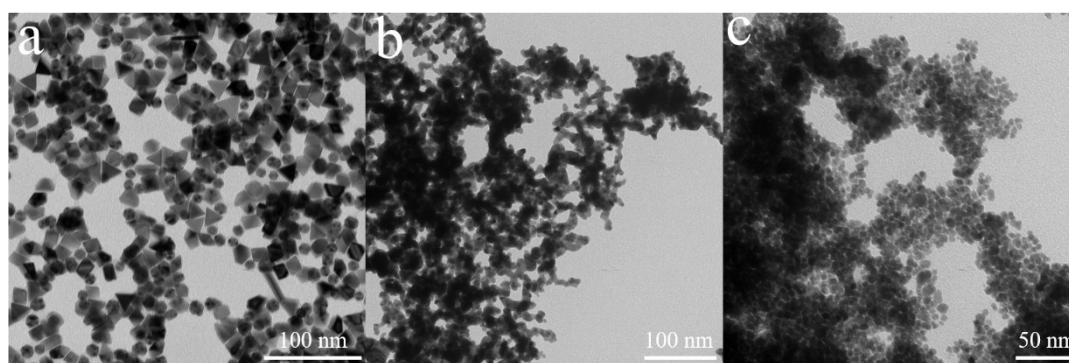

**Fig S3** TEM images of the products with the same reaction conditions as that of PdSn NNWs-3 except that (a) without the addition of  $\text{SnC}_2\text{O}_4$ , the amount of  $\text{SnC}_2\text{O}_4$  change to (b) 3.4 mg and (c) 5.1 mg.

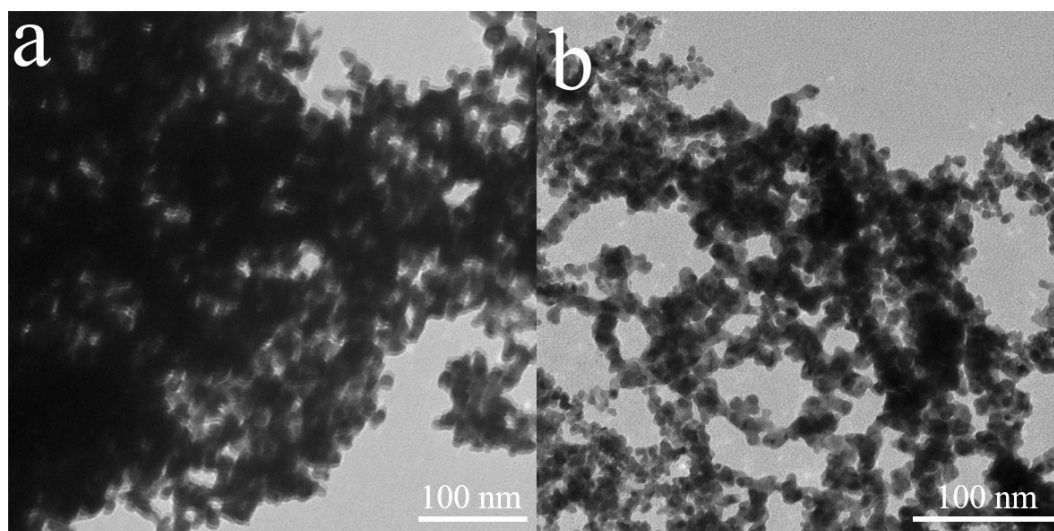

**Fig S4** TEM images of the products with the same reaction conditions as that of PdSn NNWs-3 except that (a) without the addition of  $\text{NH}_4\text{Cl}$ , (b) the amount of  $\text{NH}_4\text{Cl}$  change to 30.0 mg.

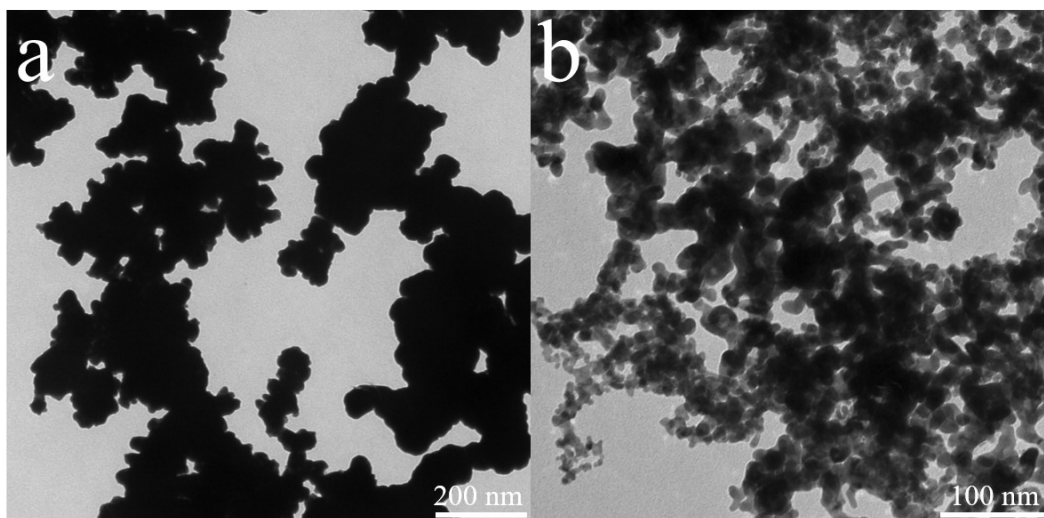

**Fig S5** TEM images of the products with the same reaction conditions as that of PdSn NNWs-3 except that (a) without the addition of PVP, the amount of PVP change to (b) 50.0 mg and (c) 300.0 mg.

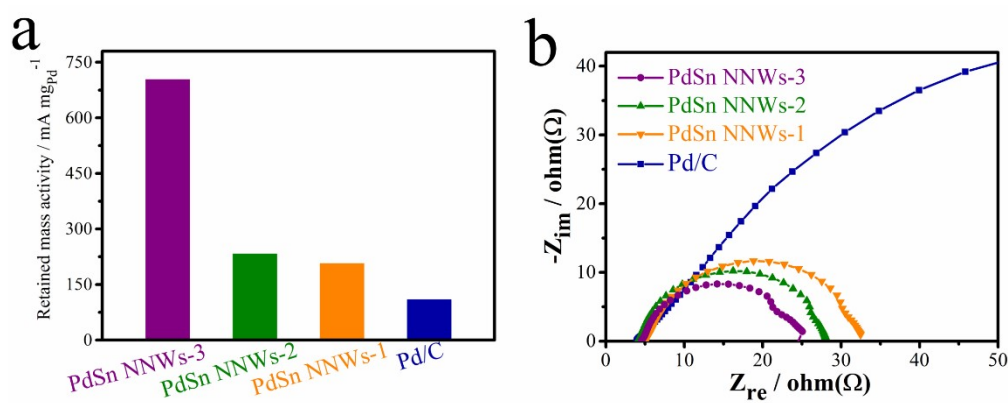

**Fig S6** (a) The calculated retained specific activities after 3600 s current-time tests and (b) the EIS spectrum of catalysts in 1 M KOH and 1 M ethanol.



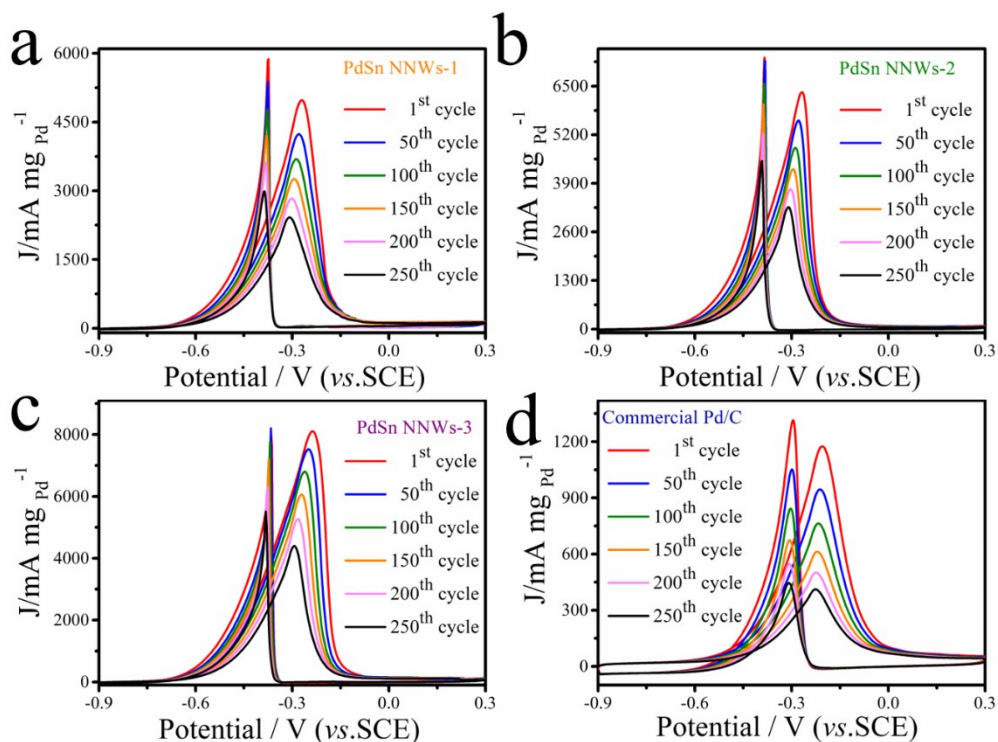

**Fig S7** The CV curves of (a) PdSn NNWs-1, (b) PdSn NNWs-2, (c) PdSn NNWs-3, and (d) commercial Pd/C catalysts after CV sweeps for 250 cycles in the solution of 1 M KOH + 1 M ethanol.

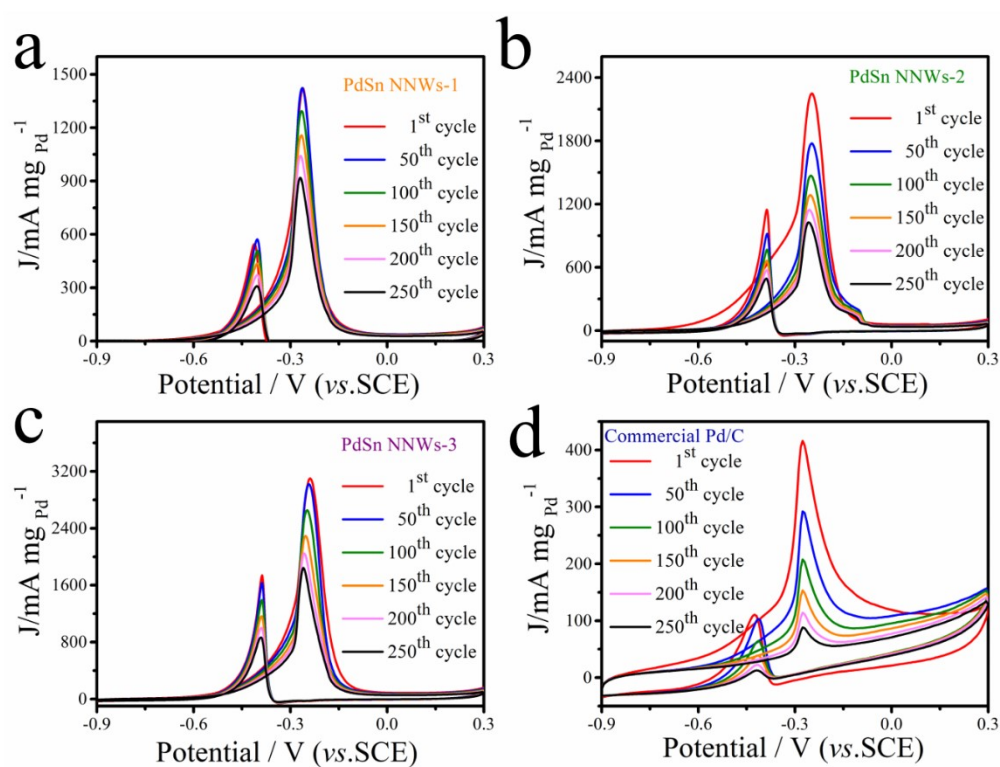

**Fig S8** The CV curves of (a) PdSn NNWs-1, (b) PdSn NNWs-2, (c) PdSn NNWs-3,

and (d) commercial Pd/C catalysts after CV sweeps for 250 cycles in the solution of 1 M KOH + 1 M methanol.

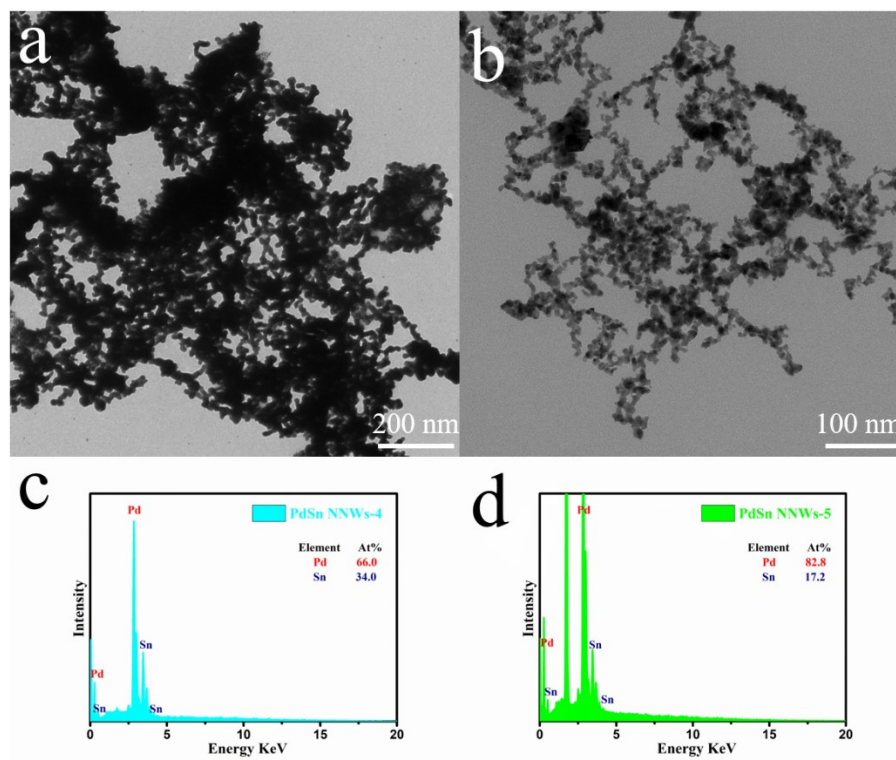

**Fig S9** TEM images and SEM-EDS spectra of (a, c) PdSn NNWs-4 and (b, d) PdSn NNWs-5.

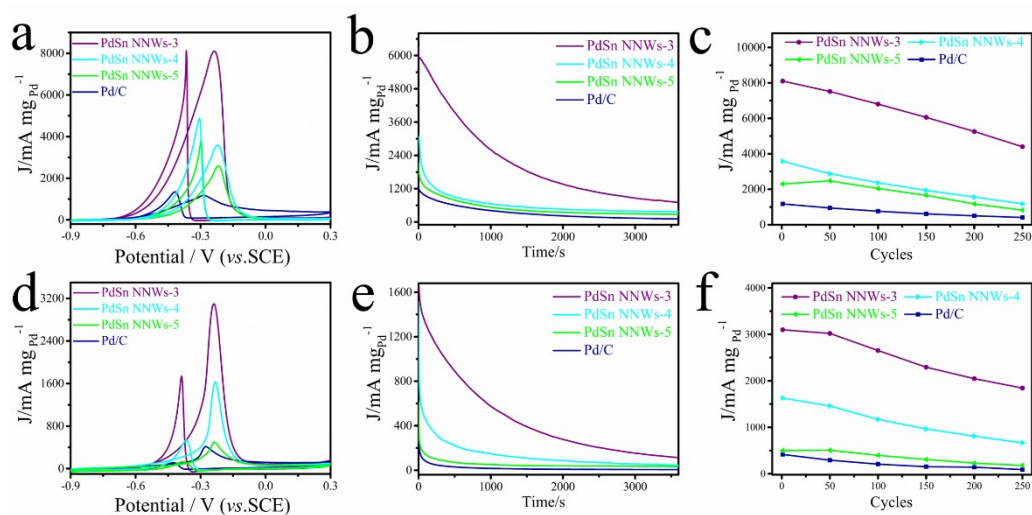

**Fig S10** (a) CV curves, (b) Current-time curves, and (c) Durability comparison of PdSn NNWs-3/4/5 and commercial Pd/C conducted in 1 M KOH + 1 M ethanol solution. (d) CV curves, (e) Current-time curves, and (f) Durability comparison of PdSn NNWs-3/4/5 and commercial Pd/C conducted in 1 M KOH + 1 M methanol solution.

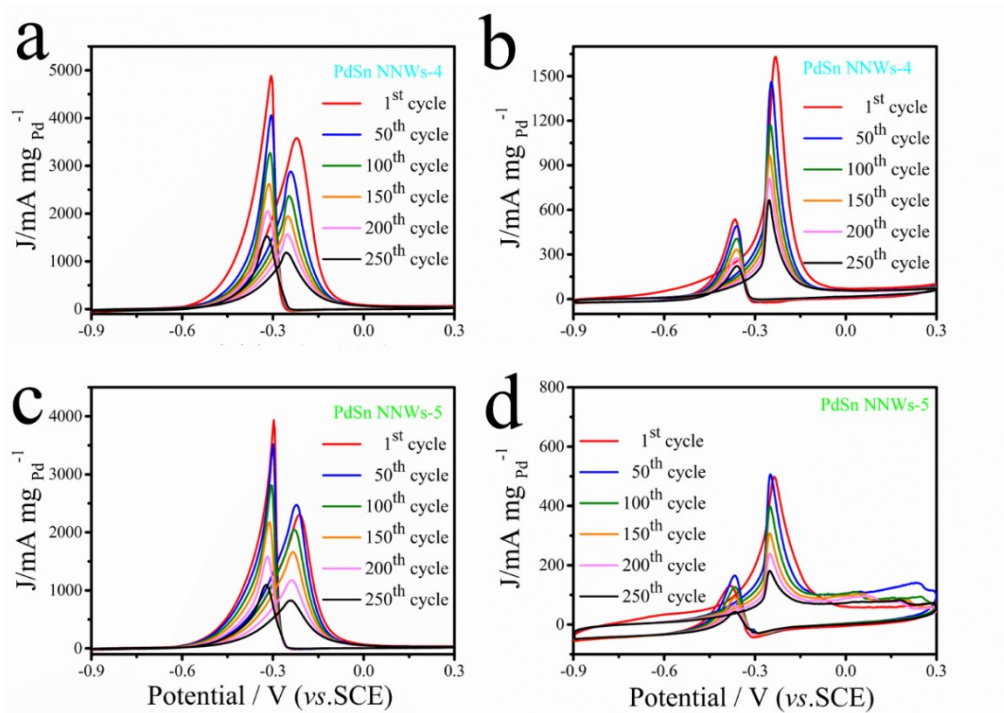

**Fig S11** The CV curves of (a,b) PdSn NNWs-4 and (c,d) PdSn NNWs-5 after CV sweeps for 250 cycles in the solution of 1 M KOH + 1 M ethanol/1 M KOH + 1 M methanol.

**Table S1** Electrochemical properties of catalysts.

| Catalysts                 | Electrolyte                   | Mass activity<br>(mA mg <sup>-1</sup> ) | Specific activity<br>(mA cm <sup>-2</sup> ) | References   |
|---------------------------|-------------------------------|-----------------------------------------|---------------------------------------------|--------------|
| PdSn NNWs-1               | 1.0 M KOH +<br>1.0 M ethanol  | 4978.0                                  | 11.6                                        | This<br>work |
| PdSn NNWs-2               | 1.0 M KOH +<br>1.0 M ethanol  | 6340.0                                  | 13.2                                        | This<br>work |
| PdSn NNWs-3               | 1.0 M KOH +<br>1.0 M ethanol  | 8105.0                                  | 14.1                                        | This<br>work |
| PdSn NNWs-1               | 1.0 M KOH +<br>1.0 M methanol | 1423.0                                  | 3.3                                         | This<br>work |
| PdSn NNWs-2               | 1.0 M KOH +<br>1.0 M methanol | 2249.5                                  | 4.7                                         | This<br>work |
| PdSn NNWs-3               | 1.0 M KOH +<br>1.0 M methanol | 3099.5                                  | 5.4                                         | This<br>work |
| C-PdSn/SnO <sub>x</sub>   | 1 M KOH + 1<br>M ethanol      | 3200.0                                  |                                             | 1            |
| Pd <sub>3</sub> NiP/N-rGO | 1 M KOH + 1                   | 2223.0                                  | 3.9                                         | 2            |

|                                                              |                                                     |        |     |              |
|--------------------------------------------------------------|-----------------------------------------------------|--------|-----|--------------|
|                                                              | M ethanol                                           |        |     |              |
| Pd/a-SrRuO <sub>3</sub>                                      | 1 M ethanol +1<br>M KOH                             | 4000.0 |     | 3            |
| Pd/NCB@NGS<br>-2                                             | 1.0 M KOH +<br>1.0 M ethanol                        | 2690.4 | 5.2 | 4            |
| PdCuB@N-G                                                    | 1.0 M KOH +<br>1.0 M ethanol                        | 5830.0 |     | 5            |
| Pd <sub>3</sub> Sn-S                                         | 1 M KOH + 1<br>M CH <sub>3</sub> CH <sub>2</sub> OH | 1405.5 |     | 6            |
| Pd <sub>1.5</sub> Sn/f-C                                     | 1 M NaOH + 1<br>M C <sub>2</sub> H <sub>5</sub> OH  | 3413.3 |     | 7            |
| Pd <sub>1</sub> Sn <sub>0.40</sub> /TiO <sub>2</sub> -<br>GO | 1 M KOH + 1<br>M ethanol                            | 3005.0 |     | 8            |
| PdNCs                                                        | 1 M KOH<br>solution + 1 M<br>MeOH                   | 2275.0 |     | 9            |
| Pd <sub>6</sub> Ru <sub>4</sub> /TiO <sub>2</sub> -1         | 0.5 M NaOH +<br>1.0 M CH <sub>3</sub> OH            | 2803.3 |     | 10           |
| Pd/BNG                                                       | 1 M CH <sub>3</sub> OH +<br>0.5 M NaOH              | 707.5  |     | 11           |
| Pd <sub>67</sub> Au <sub>33</sub>                            | 0.5 M NaOH +<br>2.0 M CH <sub>3</sub> OH            |        | 5.3 | 12           |
| Pd <sub>1.2</sub> Cu <sub>0.2</sub>                          | 1 M CH <sub>3</sub> OH<br>and 1 M KOH               | 1101.6 | 0.8 | 13           |
| Pd <sub>3</sub> Rh <sub>1</sub> NAs                          | 1.0 M methanol<br>+ 1.0 M KOH                       | 869.0  | 3.0 | 14           |
| Pd-PdO PNTs-<br>260                                          | 1 M KOH + 1<br>M CH <sub>3</sub> OH                 | 1111.3 |     | 15           |
| Pd/C                                                         | 1.0 M KOH +<br>1.0 M ethanol                        | 1175.0 | 2.9 | This<br>work |
| Pd/C                                                         | 1.0 M KOH +<br>1.0 M methanol                       | 415.9  | 1.0 | This<br>work |



1. Q. Gao, T. Mou, S. Liu, G. Johnson, X. Han, Z. Yan, M. Ji, Q. He, S. Zhang, H. Xin and H. Zhu, *J Mater Chem A*, 2020, **8**, 20931-20938.
2. S. R. Chowdhury, T. Maiyalagan, S. K. Bhattachraya and A. Gayen, *Electrochim. Acta*, 2020, **342**, 136028.
3. X. Wu, J. He, M. Zhang, Z. Liu, S. Zhang, Y. Zhao, T. Li, F. Zhang, Z. Peng, N. Cheng, J. Zhang, X. Wen, Y. Xie, H. Tian, L. Cao, L. Bi, Y. Du, H. Zhang, J. Cheng, X. An, Y. Lei, H. Shen, J. Gan, X. Zu, S. Li and L. Qiao, *Nano Energy*, 2020, **67**, 104247.
4. S. Li, J. Shu, S. Ma, H. Yang, J. Jin, X. Zhang and R. Jin, *Applied Catalysis B: Environmental*, 2021, **280**, 119464.
5. L. Sun, H. Lv, Y. Wang, D. Xu and B. Liu, *J Phys Chem Lett*, 2020, **11**, 6632-6639.
6. T. Song, F. Gao, Y. Zhang, P. e. Yu, C. Wang, Y. Shiraishi, S. Li, C. Wang, J. Guo and Y. Du, *J Taiwan Inst Chem E*, 2019, **101**, 167-176.
7. A. M. Makin Adam, A. Zhu, L. Ning, M. Deng, Q. Zhang and Q. Liu, *Int. J. Hydrogen Energy*, 2019, **44**, 20368-20378.
8. X. Wang, C. Zhang, M. Chi, M. Wei, X. Dong, A. Zhu, Q. Zhang and Q. Liu, *Int. J. Hydrogen Energy*, 2021, **46**, 19129-19139.
9. L. Sahoo and U. K. Gautam, *ACS Applied Nano Materials*, 2020, **3**, 8117-8125.
10. Y. Zheng, F. Chen, X. Liu, X. Guo, Y. Ying, Y. Wu, Y. Wen and H. Yang, *J. Power Sources*, 2020, **472**, 228517.
11. Y. Yang, H. Huang, B. Shen, L. Jin, Q. Jiang, L. Yang and H. He, *Inorg Chem Front*, 2020, **7**, 700-708.
12. O. Dobrovetska, I. Saldan, L. Orovčik, D. Karlsson, M. H. Sahlberg, Y. Semenyuk, O. Pereviznyk, O. Reshetnyak, O. Kuntiyi, I. Mertsalo, R. Serkiz and B. Stelmakhovych, *Int. J. Hydrogen Energy*, 2020, **45**, 4444-4456.
13. N. Ye, Z. Jiang and T. Fang, *Electrochim. Acta*, 2020, **352**, 136473.
14. S. Wang, F. Wang, H. Liu, H. Huang, X. Meng, Y. Ouyang, M. Jiang, T. Zeng, H. Chen, L. Zheng and L. Y. Zhang, *Colloids and Surfaces A: Physicochemical and Engineering Aspects*, 2021, **616**, 126323.
15. T.-J. Wang, F.-M. Li, H. Huang, S.-W. Yin, P. Chen, P.-J. Jin and Y. Chen, *Adv. Funct. Mater.*, 2020, **30**, 2000534.
